1  
2  
3  
4  
5  
6  
7  
8  
9  
10  
11  
12  
13  
14  
15  
16  
17  
18  
19  
20  
21  
22  
23  
24  
25

## **The olfactory organ is a unique site for resident neutrophils in the brain**

M. Fernanda Palominos<sup>1,2</sup>, Danissa Candia<sup>1,2</sup>, Jorge Torres Paz<sup>3</sup> and Kathleen E. Whitlock<sup>1,2</sup>

1. Centro Interdisciplinario de Neurociencia de Valparaíso (CINV)

Pasaje Harrington 287, Universidad de Valparaíso

2. Instituto de Neurociencia

Avenida Gran Bretaña 1111, Universidad de Valparaíso

Valparaíso, Chile

Teléfono: 56-32-299-5510, 56-32-250-8040

FAX: 56-32-250-8027

3. Université Paris-Saclay, CNRS, Institut des Neurosciences Paris-Saclay, 91190,

Gif-sur-Yvette, France

*Correspondence to be sent to: Kathleen Whitlock*

*Instituto de Neurociencia, Universidad de Valparaíso, Valparaíso, Chile*

e-mail: [kathleen.whitlock@uv.cl](mailto:kathleen.whitlock@uv.cl)

25

## Abstract

26 For decades we have known that the brain “drains” through the subarachnoid space  
27 following a route that crosses the cribriform plate to the nasal mucosa and cervical  
28 lymph nodes. Yet little is known about the potential role of the olfactory epithelia and  
29 associated lymphatic vasculature in the immune response. To better understand the  
30 immune response in the olfactory organs we used cell-specific fluorescent reporter lines  
31 in dissected, intact adult brains to visualize blood-lymphatic vasculature and neutrophils  
32 in the olfactory sensory system. Here we show that the extensive blood vasculature of  
33 the olfactory organs is associated with a lymphatic cell type resembling high endothelial  
34 venules (HEVs) of the lymph nodes in mammals and a second resembling Mural  
35 Lymphatic Endothelial Cells (muLECs) that extended from the brain to the peripheral  
36 olfactory epithelia. Surprisingly, the olfactory organs contained the only neutrophil  
37 populations observed in the brain. Damage to the olfactory epithelia resulted in a rapid  
38 increase of neutrophils within the olfactory organs as well as the appearance of  
39 neutrophils in the brain suggesting that neutrophils enter the brain in response to  
40 damage. Analysis of cell division during and after damage showed an increase in BrdU  
41 labeling in the olfactory epithelia and a subset of the neutrophils. Our results reveal a  
42 unique population of neutrophils in the olfactory organs that are associated with an  
43 extensive lymphatic vasculature suggesting a dual olfactory-immune function for this  
44 unique sensory system.

45

46

46

47

48 Abbreviations: CSF, Cerebral Spinal Fluid; CP, Cribriform Plate; OB, Olfactory Bulb;  
49 OSNs, Olfactory Sensory Neurons; OO, Olfactory Organ; OE, Olfactory Epithelia; EN,  
50 Epineurium; ns, non-sensory epithelia; ss, sensory epithelia; muLEC, Mural Lymphatic  
51 Endothelial Cells; HEV, High Endothelial Venules; LV, lymphatic vasculature; BV, blood  
52 vasculature; (BV), CNS, central nervous system.

53 Key Words: Olfactory sensory neurons (OSNs), Olfactory Bulb (OB), High endothelial  
54 venules (HEV), Mural Lymphatic Endothelial Cells (muLECs), copper,

55

55

## Highlights

56 • The olfactory organ is the only region of the brain that contains resident neutrophils  
57 in the adult animal.

58 • Damage to olfactory sensory neurons triggers a rapid mobilization of neutrophils  
59 within the olfactory organ and in the central nervous system.

60 • Two types of lymphatic vasculature resembling Mural Lymphatic Endothelial Cells  
61 (muLEC) and High Endothelial Venules (HEV) are present in the olfactory sensory  
62 system.

63 • Lymphatic vasculature resembling Mural Lymphatic Endothelial Cells (muLEC) wrap  
64 the olfactory bulbs and extend across the cribriform plate to olfactory epithelia.

65

66

## 66 **Introduction**

### 67 ***The adult olfactory organ blood-lymphatic system***

68 In vertebrates the olfactory sensory neurons (OSNs), a group of continually renewing  
69 neurons located in the olfactory epithelium (OE), extend their axons across the  
70 cribriform plate where they make their first synapses in the olfactory bulb (OB) (Sakano,  
71 2010; Whitlock, 2015). This connection between the OE and the OB is part of a complex  
72 neural and immune interface that includes flow of cerebral spinal fluid (CSF) and  
73 interstitial fluid (ISF) from the subarachnoid space toward the nasal mucosa. Evidence  
74 supporting a connection between the subarachnoid space of the brain and cervical  
75 lymph nodes via the nasal mucosa was first proposed over a century ago (for review  
76 see: (Faber, 1937; Jackson *et al.*, 1979). Subsequent studies in mammals using labeled  
77 tracers confirmed a drainage route from the cranial subarachnoid space through the  
78 olfactory pathway leaving the nasal mucosa via terminal lymphatics or into blood  
79 capillaries (Cserr *et al.*, 1992). Thus the potential for turnover of brain extracellular  
80 fluids, via drainage to blood and deep cervical lymph, presented a system whereby  
81 immunogenic material and immune cells from the central nervous system (CNS) could  
82 pass to immune organs outside the brain via the olfactory epithelia.

83 The lymphatic system of vertebrates, composed of lymphatic vessels, lymphoid  
84 organs/tissues and the circulating lymph fluid, is highly conserved at the functional level  
85 (Boehm *et al.*, 2012) and is suggested to have originated in teleost fishes where the  
86 heart provided the energy to propel lymph through vessels associated with the primary  
87 vasculature (Hedrick *et al.*, 2013). Lymphocytes are generated in primary lymphoid  
88 organs (thymus and bone marrow: mammals / thymus and kidney; teleost fishes) and

89 maintained in secondary lymphoid tissues (spleen and lymph nodes; mammals/spleen,  
90 nasopharynx and gill tissues: teleost fishes) (Bjørngen and Koppang, 2021). Of particular  
91 interest are the nasopharynx-associated lymphoid tissues (NALT), a term used in  
92 mammals to describe the network of lymphoid tissue in the pharynx and palate (tonsils).  
93 Teleost fish lack organized lymphoid structures such as tonsils yet a recent study  
94 suggested the presence of a NALT-like diffuse network of lymphoid and myeloid cells  
95 scattered both intraepithelial and in the lamina propria of the fish olfactory organ (Tacchi  
96 *et al.*, 2014).

97 More recently the “re-discovery” of lymphatic vasculature associated with the meninges  
98 in the central nervous system (CNS) of mammals (Aspelund *et al.*, 2015);(Louveau *et*  
99 *al.*, 2015);(Da Mesquita *et al.*, 2018);(Dolgin, 2020) and of zebrafish (Bower *et al.*,  
100 2017); (Bower and Hogan, 2018) coupled with studies indicating that the meninges  
101 contain a diverse array of immune cells that can migrate via the sinus-associated  
102 meningeal lymphatic vessels and/or via cribriform plate and nasal lymphatics into  
103 cervical lymph nodes (Rua and McGavern, 2018)(Rustenhoven *et al.*, 2021) (Sun *et al.*,  
104 2018), have led to a renewed interest in immune trafficking in the nervous system. To  
105 date in spite of over a century of reports on “brain drainage” through the olfactory  
106 system/nasal mucosa and the expanded knowledge of lymphatic vasculature in the  
107 vertebrate brain, there are no detailed descriptions of the lymphatic vasculature (LV) in  
108 the olfactory organ.

109

### 110 ***Neutrophils and the Nervous System.***

111 Neutrophils the most abundant type of white blood cells are normally found in the blood

112 stream where they are rapidly recruited to a site of injury or infection and perform a  
113 critical role in inflammation and pathogen clearance. Neutrophils have been shown to  
114 interact with and regulate not only the innate but also the adaptive immune cells where  
115 they can rapidly migrate via afferent lymphatics of inflamed tissues to lymph nodes  
116 (Voisin and Nourshargh, 2019) (Beauvillain *et al.*, 2011) (Hampton *et al.*, 2015; Maletto  
117 *et al.*, 2006). Thus neutrophils migrate not only on the blood vasculature and interstitial  
118 tissues, but can migrate into the lymphoid system and are in the unique position to  
119 participate in the very early stages of both innate and adaptive immune responses.  
120 Under normal conditions, neutrophils are scarce in the CNS where the brain–blood  
121 barrier (BBB) prevents their migration into the brain parenchyma and cerebrospinal  
122 fluid. Conditions of neuroinflammation and injury induced damage to the BBB are  
123 associated with the infiltration of the CNS by neutrophils (Harrison-Brown *et al.*, 2016;  
124 Khorrooshi *et al.*, 2020; Manda-Handzlik and Demkow, 2019).

125 Previously, we performed both microarray and RNAseq analyses (Harden *et al.*, 2006)  
126 (Calfun *et al.*, 2016) of zebrafish adult OE to investigate differentially expressed genes  
127 involved in the formation of olfactory memory (Whitlock, 2006). In addition to known  
128 genes expressed in the OE, we found genes specific to both the innate and the adaptive  
129 immune systems (Calfún, 2017), prompting us to investigate the potential “immune  
130 architecture” of the OE.

131 We have shown that neutrophils populate the developing olfactory organ and use the  
132 blood vasculature to migrate to the olfactory organ in response to injury (Palominos and  
133 Whitlock, 2020). With the recent re-discovery of the CNS lymphatics in mammals and  
134 zebrafish (Bower and Hogan, 2018; Louveau *et al.*, 2015), we examined the extent of

135 lymphatic vasculature in the adult olfactory organs and its association with blood  
136 vasculature. Neutrophils, known to play a key role in both the innate and the adaptive  
137 immune response (Odobasic *et al.*, 2016);(Meinderts *et al.*, 2019);(Yang *et al.*, 2010),  
138 were always found in the olfactory organ of adult zebrafish under both normal and  
139 damage conditions. In fishes, the olfactory bulb may be involved in immune responses  
140 where activation of immune cells in the olfactory bulb resulted from peripheral neuronal  
141 signals (Das and Salinas, 2020). Our results suggest that the olfactory organ has the  
142 potential to respond quickly to damage via a local population of neutrophils located in  
143 both the neuronal and non-neuronal tissues of the olfactory organ.

144

145

146

## RESULTS

### 147 **The Adult Olfactory Sensory System has Extensive Lymphatic Vasculature**

148 Previously we have shown that the lymphatic vasculature (LV) associated with the  
149 developing olfactory organs is evident at 14 days post fertilization (dpf) initiating in the  
150 ventrolateral side of the organ (Palominos and Whitlock, 2020). To better understand  
151 the LV system in the olfactory sensory system of the adult we dissected brains, with  
152 olfactory organs attached, from *Tg(lyve1b:EGFP;OMP:RFP)* animals (Fig. 1). The  
153 olfactory organs (OO) are made up of sensory epithelia containing the OMP:RFP<sup>+</sup>  
154 sensory neurons (Fig. 1A-D, F, red) and respiratory epithelia, surrounded by what  
155 appears to be an extension of the epineurium (EN) of the olfactory nerve (Fig 1A-D,  
156 EN). At this point it is not clear where the meningeal membranes fuse with the  
157 epineurium after crossing the cribriform plate (Jackson *et al.*, 1979). Viewed from the



158 dorsal side, lyve1b:EGFP<sup>+</sup> LV were found in the OO (Fig 1A, OO, green, B, green,  
159 arrowheads), olfactory bulb (Fig 1A, OB, green, arrow) and diencephalon (Fig. 1A, TeO,  
160 green, arrow), but not the telencephalon. In the dorsal OO the lyve1b:EGFP<sup>+</sup> cells (Fig.  
161 1B, green, arrowheads) line the lamellae of the OE (Fig. 1B, LOE). In contrast, when  
162 viewed from the ventral side there was an apparently continuous network of LV  
163 extending from the OO to the OB and along ventral telencephalon (Fig. 1 C, D, green).  
164 The lyve1b:EGFP<sup>+</sup> cells were also evident in the ventral OO associated with the  
165 olfactory nerve (Fig. 1D, ON, red). Two morphologically distinct lymphatic cell types  
166 were observed. In the OO thick tubular cells associated with the LOE (Fig. 1B, D,  
167 arrowheads), resembling High Endothelial Venules (HEV-like, HEV-L; Fig. 1E) that  
168 control lymphocyte trafficking in mammals (Ager, 2017). To date these cells have not  
169 been described in the peripheral olfactory sensory system. In the OB smaller  
170 lyve1b:EGFP<sup>+</sup> cells covering the dorsal OB and ventral telencephalon, apparently  
171 connected by fine processes, resembled Mural Lymphatic Endothelial Cells (muLEC-L)  
172 after Bower (Bower *et al.*, 2017) (Fig. 1D, arrows, green, F, muLEC-L, green). This cell  
173 type was also observed in the OO (Figs. 2, 3). In contrast to the cells described by  
174 Bower, the muLEC-L appeared to be connected by fine processes (Fig. 1, F, arrows)  
175 and not separate cells like the BV-associated muLECs (Bower *et al.*, 2017). At this time  
176 it is not clear whether these connections have a lumen. Thus, in adult zebrafish there is  
177 an extensive LV system associated with the olfactory sensory system (Fig. 1) wrapping  
178 the OE (HEV-L), encompassing the olfactory bulb (muLEC-L) with apparently  
179 continuous connections along the ventral telencephalon (Fig. 1 C).  
180



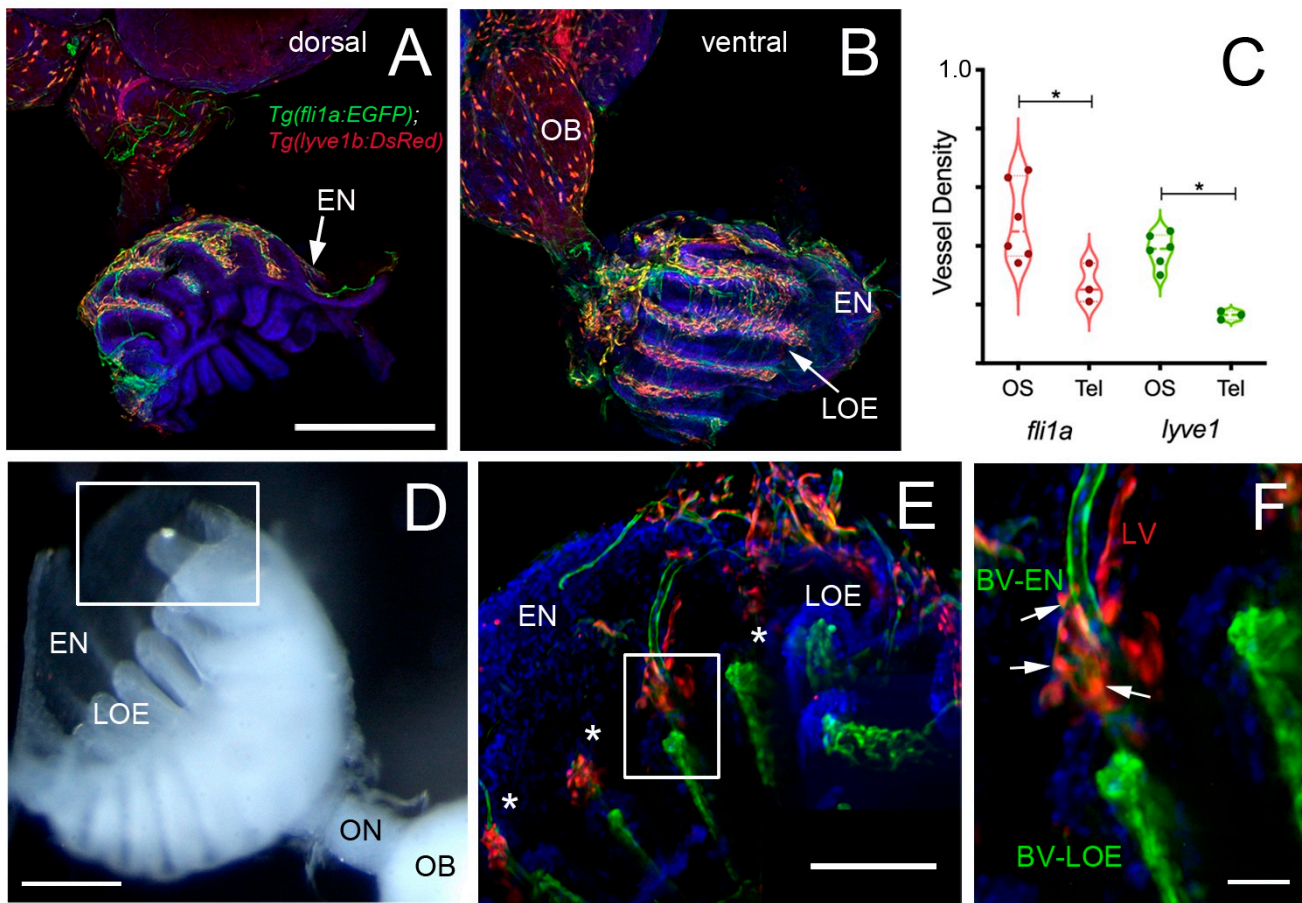

194 **Figure 2. The adult olfactory organs (OO) have extensive and interconnected**  
 195 **Blood (BV) and Lymphatic Vasculature (LV).** A, B. Whole mount  
 196 *Tg(fli1a:EGFP;lyve1b:DsRed)* adult OO connected to OB with BV (*fli1a:EGFP*, green)  
 197 and LV (*lyve1b:DsRed*, red). Dorsal (A) and ventral (B) views; DAPI (blue), Scale Bars:  
 198 A, B = 200  $\mu$ m. C. BV (red) and LV (green) density is greater (SE, P-value <0.05,  
 199 unpaired t-test) in olfactory system (OS = OE and OB) than telencephalon (Tel),  $n = 6$   
 200 adult brains. One-way ANOVA, Tukey multiple comparison test,  $P < 0.05$ .  
 201 Representative images selected from detailed analysis of least 6 brains. D. Transmitted  
 202 light image of fixed whole mount OO. Boxed area represent where LOE connect with  
 203 EN. Scale bar = 100  $\mu$ m, E. At the distal tips of each lamellae (asterisks) the LV (red)  
 204 meet the BV (green) (E, boxed area). Scale bar = 100  $\mu$ m, F. Cells express both

205 lyve1b:DsRed and fli1a:EGFP (arrows). Scale bar = 25  $\mu$ m. A, B, E, F: Analysis of 9  
206 brains.

207 To investigate the association of lymphatic vasculature (LV) with blood vasculature (BV)  
208 in the OOs, *Tg(lyve1b:DsRed;fli1a:EGFP)* animals were used to visualize the LV (red)  
209 and BV (green) (Fig. 2). We found extensive BV (*fli1a:EGFP*<sup>+</sup>) surrounding the OE  
210 associated with the EN in both the dorsal (Fig. 2A, green) and ventral (Fig 2B, green)  
211 OO and OB. The BV (Fig 2A, B, green) and LV (Fig. 2A, B, red) form an extensive  
212 network extending along the lamellae of the dorsal and ventral OE. In comparing the  
213 density of BV and LV in the dorsal brain, the OE/OB have a greater density of BV and  
214 LV than the telencephalon (Fig. 2C) reflecting the intimate association of the BV and LV  
215 with the OO/OB. The BV (Fig. 2A, B, E, F, green) and LV (Fig. 2A, B, E, F, red) extends  
216 along the EN that surrounds the LOE (Fig. 2D, E) and meet at the tips of the LOE where  
217 muLEC-L like cells were observed (Fig. 2E boxed area, red, F arrows). Thus the  
218 extensive BV and LV associated with the EN and OE connect along the distal lamellae  
219 where distinct BV morphologies are associated with the EN and LOE (Fig. 2F).

220 In mammals, the olfactory lymphatic route crosses the cribriform plate (CP) separating  
221 the OBs and OOs draining cerebral spinal fluid (CSF) through the perineural space  
222 surrounding olfactory nerve (Sun *et al.*, 2018), connecting to nasal lymphatics and  
223 carrying lymphatic endothelial cells, T, B lymphocytes and antigen presenting cells  
224 (APCs) toward cervical lymph nodes (Kaminski *et al.*, 2012). To characterize the LV  
225 structure crossing the cribriform plate we sectioned intact, decalcified heads from  
226 *Tg(lyve1b:DsRed;fli1a:EGFP)* animals to determine whether the muLEC-L cells or HEV-  
227 L cells extended across the cribriform plate (Fig. 3, CP). Dorsal to, and at the site of, ON

228 crossing (Fig. 3, A, B) the OE was populated primarily by *fli1a:EGFP*<sup>+</sup> BV. The  
229 *lyve1b:DsRed*<sup>+</sup> LV (Fig. 3C, red, arrowhead) is associated with the *fli1a:EGFP*<sup>+</sup> BV  
230 surrounding the ON (Fig. 3C, green) as it crosses the CP and lines the basal region of  
231 the OE (Fig. 3C, D, red, arrows). The muLEC-like cells of the LV lined the BV both on  
232 the intra-cranial (Fig. 3E, arrows) and extra-cranial side (Fig. 3E, arrowheads) of the  
233 ethmoid bone. We never observed HEV-L cells (Fig 1E) crossing the CP or on the intra-  
234 cranial side of the ethmoid bone. Thus the muLEC-L lymphatic cells associated with the  
235 BV were found wrapping the exterior surface of the OB (Fig. 1D, F), crossing the CP  
236 (Fig. 3) and extending along the EN (Fig. 3A, B) where they were associated with the  
237 HEV-L LV of the olfactory organ (Fig. 3F).

238



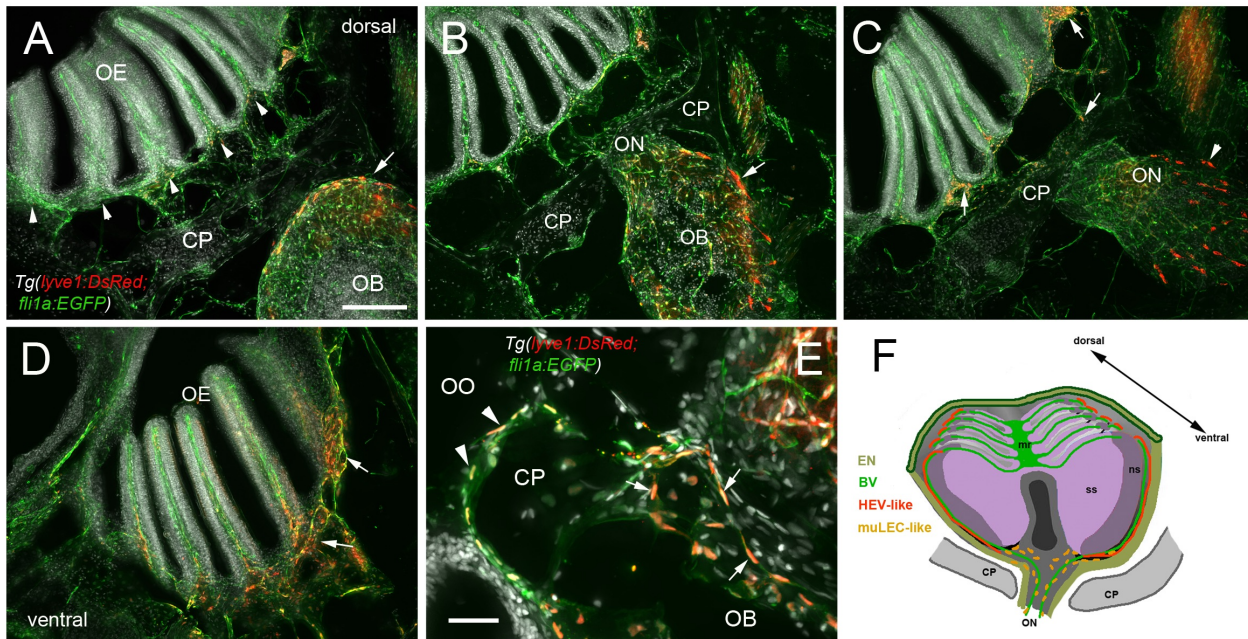

255

256 **Figure 3. Blood vasculature extends through cribriform plate with muLEC-like**

257 **lymphatic cells. A-E.** Sections from *Tg(lyve1b:DsRed;fli1a:EGFP)* adult brains (n=6

258 brains). **A.** In dorsal sections the OB is separated from the OE by the cribriform plate

259 (CP). The OB has extensive BV (green) extending into the lamellae of the OE and

260 muLEC-like cells (red) on the surface of the OB (arrow). A-D = 100 μm **B.** The ON

261 passes through the CP accompanied by extensive BV (green). muLEC-like cells are on

262 the medial surface (red, arrow) of the OB. **C.** The muLEC-like cells (red, arrow) line the

263 ventral side of the ON. **D.** muLEC-like cells line the basal OE (red, arrows) in the most

264 ventral region of the OO. **E.** muLEC-like cells on the BV extending across the CP and

265 many are positive for both *lyve1:DsRed* and *fli1a:EGFP* (arrows). Scale bar = 50 μm. **F.**

266 Diagram depicting olfactory organ with sensory (ss) and non-sensory (ns) epithelia that

267 have extensive BV (green). The lamellae of the OE contain HEV-like LV (red) that do

268 not extend across the cribriform plate (CP). muLEC-like cells (orange) line the BV and

269 extend from the olfactory bulb across the CP to the basal OE. Scale bars: A-D = 100

270 μm, E = 50 μm.

271 ***Neutrophil populations in the adult olfactory organ***

272 Neutrophils, the most abundant leukocyte sub-types in adult zebrafish, are essential  
273 players in the innate immune system and more recently have been shown to migrate  
274 not only on BV but also LV. We used the *Tg(OMP:RFP);Tg(mpx:GFP)* animals to  
275 visualize olfactory sensory neurons (red) and neutrophils (green), in fixed whole mount  
276 brains. Surprisingly, we observed neutrophils only in the OO of adult brains (Fig. 4A, B  
277 green). Neutrophils were localized in the fingerlike lamellae of the OE predominantly  
278 associated with the EN wrapping around the OE (Fig 2A, B). The OMP:RFP<sup>+</sup> OSNs  
279 (Fig. 4A, B, red, ss, red) are in the central OE (ss) and peripheral regions of the  
280 lamellae are non-sensory epithelia (Fig. 4B, ns). The tips of the LOE are connected to  
281 the EN (Fig. 4B, EN, LOE, blue; Fig. 2). Analysis of the distribution of GFP-positive  
282 neutrophils revealed that they were located primarily in the ns epithelia and EN with  
283 many fewer neutrophils in the ss epithelia (Fig. 4B, E). Within the OE/EN there were  
284 three morphologically distinct mpx:GFP<sup>+</sup> cells (Fig. 4C, D, F). Neutrophils with rounded  
285 shape (Fig. 4C, green, nt1) were associated with the basal OE, while neutrophils with  
286 amoeboid like morphology (Fig. 4C, green, nt2, D, ci=0.7) were present in the tips of the  
287 LOE and EN, although this distribution changed in response to damage of the OE (see  
288 below). In sectioned OE tissue the columnar shaped mpx:GFP<sup>+</sup> cells (Fig. 4D1, green)  
289 were morphologically similar to sustentacular cells of the OE visualized with the  
290 *Tg(six4b:mCh)* reporter line ((Torres-Paz and Whitlock, 2014); Fig. 5A, B red). These  
291 cells lie at the interface of the ss and ns epithelia (Fig. 5C) and further studies are  
292 needed to carefully characterize this class of mpx:GFP<sup>+</sup> cells. To confirm that the  
293 neutrophils observed in the whole mount OE (Fig. 4G, green) were within the OE as

294 opposed to coating superficial layers, a z-stack analysis was performed (Fig. 4G, H)  
295 showing that the mpx:GFP<sup>+</sup> cells are within the OE tissue. Thus the adult OOs are  
296 unique because they are the only regions of the adult brain where resident neutrophils  
297 are found under normal conditions.  
298



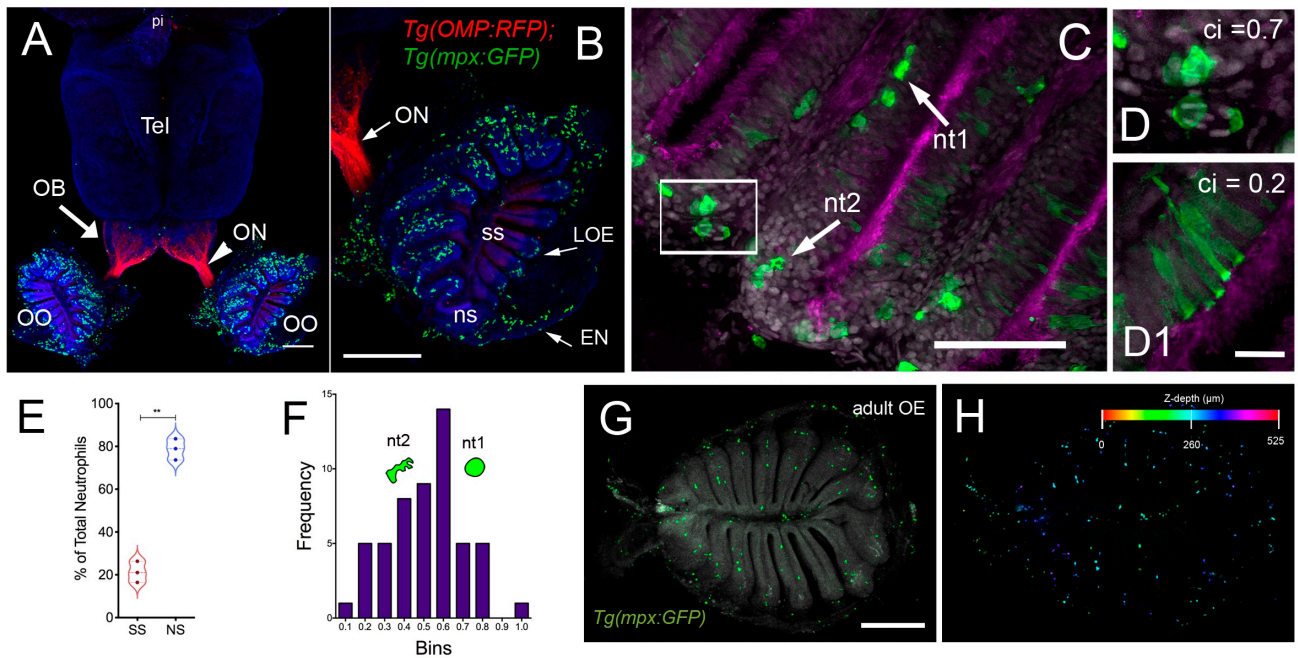

298 **Figure 4. Neutrophils are found only in the olfactory organs of the adult brain.**  
 299 **A.** Wholemount brain of *Tg(OMP:RFP);Tg(mpx:GFP)* adult: neutrophils (green) are only  
 300 present in the OO (OE/EN), telencephalon (tel), pineal (pi). Scale bars A, B = 200  $\mu$ m.  
 301 **B.** OO (from A) contains a large population of neutrophils (green,  $n=487$  neutrophils).  
 302 OMP:RFP<sup>+</sup> OSNs are located only in sensory epithelia (ss, red) not in non-sensory  
 303 epithelia (ns), olfactory nerve (ON). **C.** Neutrophils with a rounded shape, (nt1, arrow:  
 304 circularity index 0.7 or greater) and amoeboid shape (nt2, arrow: circularity index of 0.4-  
 305 0.6; **F**) were observed in the LOE. **D.** Neutrophils with an amoeboid shape (nt2, arrow)  
 306 were located throughout the OE and EN. **D1.** Sustentacular-like cells (**D1**), circularity  
 307 index 0.2, lie at ns-ss epithelia interface (Fig. 5). **E.** Total number of neutrophils in the  
 308 OO. The non-sensory (ns) tissues (respiratory epithelia + NE, blue) have more  
 309 neutrophils than sensory epithelia (ss, red),  $n= 3$  OE from 3 different fish. **F.** Frequency  
 310 distribution of nt1 and nt2 cells ( $n= 53$  neutrophils from brain shown in C). **G.** Maximal  
 311 projection of whole mount *Tg(mpx:GFP)* adult OE: Neutrophils (green);  
 312 autofluorescence (gray). (H) Neutrophils (from G) were color-coded based on (H) Z-

313 stack depth. Total depth= 550 $\mu$ m. Scale bars A, B = 200  $\mu$ m; C = 60  $\mu$ m; D, D1=20  $\mu$ m;

314 G, H =100  $\mu$ m. A, B: 9 brains imaged; C, D: 6 brains sectioned

315

315

317

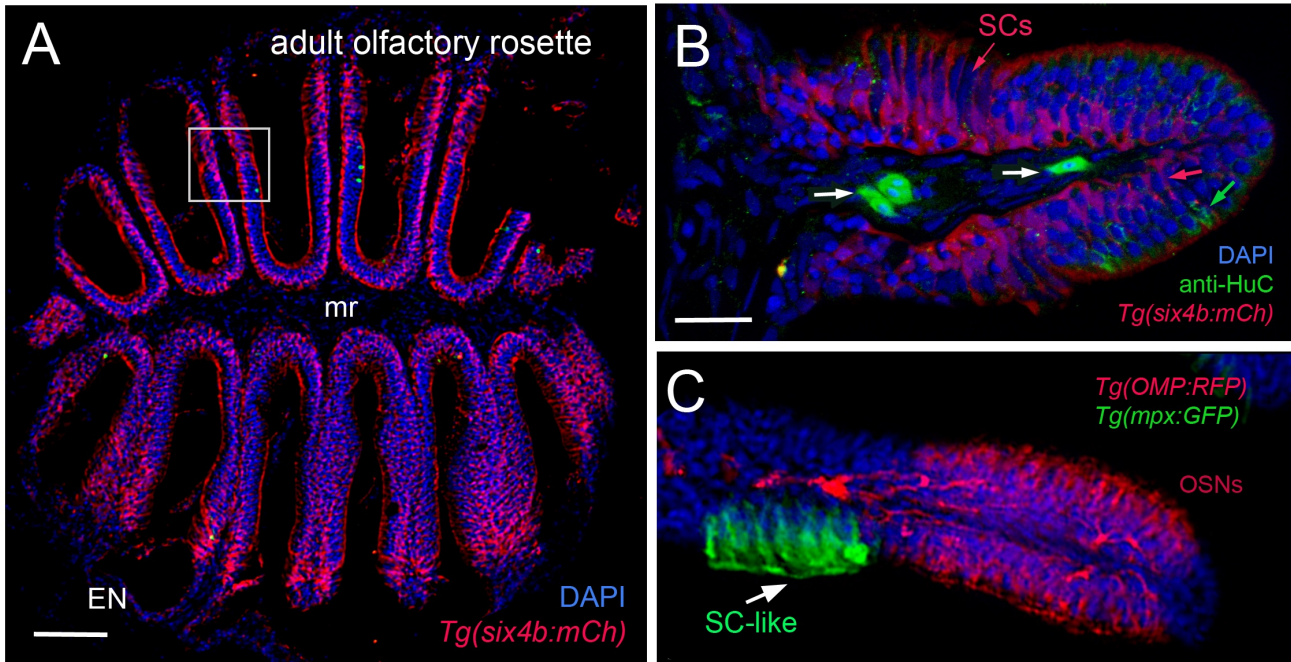

318

319 **Figure 5. Sustentacular cells in the OE are associated with markers for**

320 **neutrophils. A-C.** Cryosections of adult olfactory epithelia. **A.** Low magnification of

321 adult olfactory rosette (OE) from *Tg(six4b:mCh)* line showing sustentacular cells (red)

322 that are distributed within the lamellae of the OE where some areas have denser

323 clusters (boxed area). Epineurium (EN), midline raphe (mr). Scale bar = 100  $\mu$ m. **B.**

324 Lamellae of OE with *Six4b:mCh*<sup>+</sup> SCs (red) and anti-HuC<sup>+</sup> neurons (green). Scale bar

325 B, C = 25  $\mu$ m. **C.** *mpx:GFP*<sup>+</sup> cells (green, arrow) lie in clusters adjacent to OSN (red) and

326 are similar to SCs (SC-like, see B, red). A, B: 1 sectioned brain, C: 6 sectioned brains.

327

328

329

330

331

332 ***Neutrophil response to damage in the adult olfactory sensory system***

333 In order to investigate the neutrophil response to damage of the OE, we exposed  
334 *Tg(mpx:GFP);Tg(OMP:RFP)* adult fish to 10  $\mu$ M CuSO<sub>4</sub>. Because of the challenges of  
335 live imaging in the whole mount adult brain, adults were sacrificed at different times  
336 after copper exposure to follow the dynamics of neutrophil response over time. In  
337 untreated control animals, consistent with previous results, neutrophils (Fig. 6, green)  
338 were observed only in the OO (Fig. 6A, arrowhead, A') and were absent in the brain  
339 (Fig. 6A). After four hours of copper exposure, an increase in neutrophils was observed  
340 in the OO (Fig. 6B, green, arrowhead, B', B''). Within the OO the ns and ss OE as well  
341 as the EN (Supp. Fig. 1F, H) showed an increase in neutrophils in response to damage.  
342 Additionally neutrophils were observed in the ventromedial OB, along the telencephalic  
343 ventricle (Fig. 6B, OB, V) and in the ventral telencephalon (Fig. 6B, green, arrows). Fish  
344 left to recover for one day post-treatment still showed elevated numbers of neutrophils  
345 in the ventral OB (Fig. 6C, green, arrows, D) and the OO (Fig. 6C', green). The  
346 increased numbers of neutrophils in the OOs and subsequent appearance of  
347 neutrophils in the ventral OB and ventral telencephalon (Fig. 6D, E, vCNS), suggests  
348 that neutrophils may move from the OOs into the ventral CNS in response to peripheral  
349 damage.

350

351

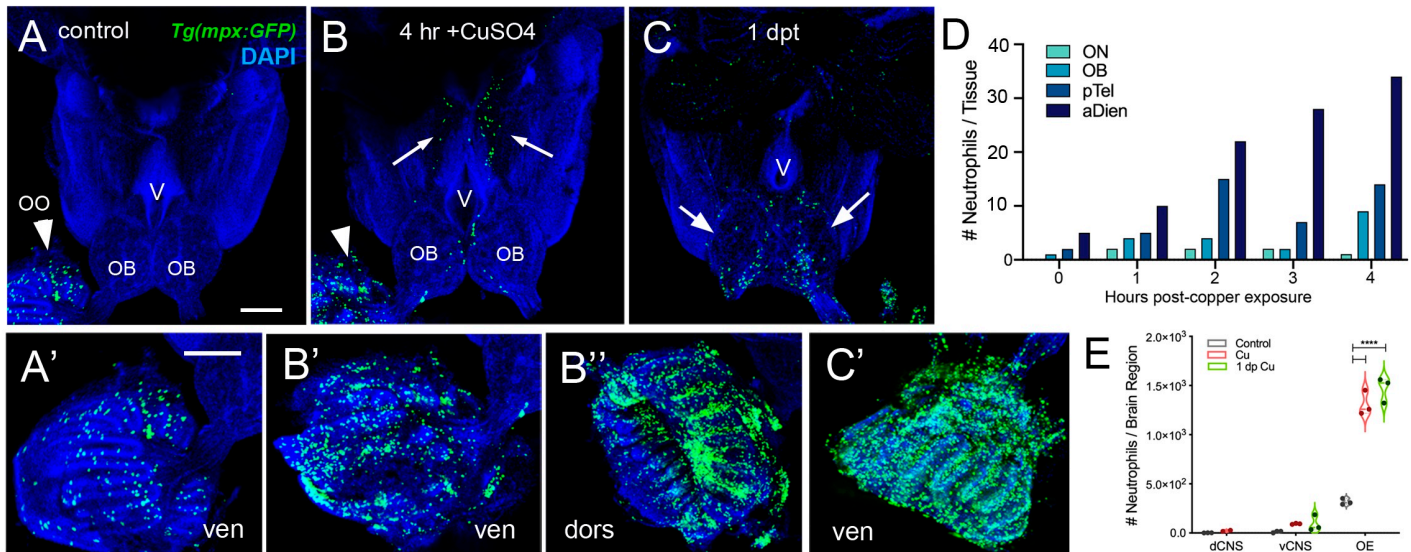

352 **Figure 6. Exposure to copper is correlated with increased neutrophils in the**  
 353 **peripheral and central nervous system. A-C.** Ventral views of whole mount adult  
 354 brains from *Tg(mpx:GFP)*. Scale bars: A-C; A'-C'= 100  $\mu$ m. **A, A'.** Control with  
 355 neutrophils found only in OO (arrowhead; A'). **(B.** After four-hour exposure to copper,  
 356 there is an increase in the number of neutrophils in the OO (B, arrowhead, B', B").  
 357 Neutrophils were observed in the ventral OB, along the ventricle (V) and in the ventral  
 358 telencephalon (B, arrows). **C.** One day post treatment neutrophils are still present in OO  
 359 (C'), OB (arrows) and ventral telencephalon. **D.** Neutrophils appear over time in an  
 360 anterior to posterior spatial pattern in the CNS. OO is not plotted because number  
 361 (average ~1,500) is out of range (see E). **E.** Copper exposure was correlated with  
 362 increased neutrophils in OE and ventral CNS. A-C, A'-C': 3 brains were examined per  
 363 treatment and summarized in E. Preparations were selected for imaging based on  
 364 whether they were intact and the signal to noise of the labeling. D:For each timepoint 1  
 365 brain was analyzed.

366



367

368 ***Damage induced changes in cell cycle dynamics in the olfactory sensory system***

369 To further investigate the cellular dynamics of the neutrophil response to copper-  
370 induced damage in the adult, we repeated the experiments with copper using  
371 *Tg(mpx:GFP)* animals in the presence of BrdU. When viewed in flattened whole mount  
372 preparations (Fig. 7A-C), the OE of the adult is organized as a “rosette” with the central  
373 region midline raphe (mr) surrounded by ss and the outer regions of the rosette (tips of  
374 the lamellae) containing the ns or respiratory epithelia. In control animals (Fig. 7A,  
375 viewed looking into the rosette) BrdU labeling, consistent with the mitogenic nature of  
376 the olfactory system, was observed (Bayramli *et al.*, 2017; Brann and Firestein, 2014).  
377 After four hours of copper exposure, BrdU labeling showed significant increases in the  
378 mr (Fig. 7B, white, arrow), and in the ns epithelia extending to the EN. In contrast, one  
379 day post treatment (dpt) significant increases in BrdU labeling were observed in the ss  
380 epithelia (Fig. 7C, F) consistent with the renewal of OSN in the OE after damage (Iqbal  
381 and Byrd-Jacobs, 2010). Additionally the neutrophils now lined LOE (Fig. 7C, green)  
382 possibly in association with the BV (Fig. 7D, green). The number of neutrophils showed  
383 significant increases at 4 hours post-treatment (hpt) and remained high in the ss  
384 epithelia one dpt (Fig. 7E;  $444.67 \pm 31.39$  and  $373.33 \pm 32.32$  neutrophils in 4 hpt, red,  
385 and 1 dpt, green). Significant increases in BrdU labeling at both 4 hpt and 1 dpt were  
386 observed only in the ss epithelia (Fig. 7F;  $480 \pm 241.76$  and  $786 \pm 211.6$ , respectively).  
387 Analysis of cells expressing both *mpx:GFP* and BrdU showed a significant increase  
388 compared to control animals (Fig. 7G, control:  $9 \pm 1$ , 4 hpt:  $26 \pm 6$ , 1 dpt:  $22 \pm 5.29$ ).  
389 The frequency of rounded neutrophils (see Fig. 4C, green, nt1; ci 0.7 or greater) and

390 amoeboid-like (see Fig. 4C, green, nt2; ci 0.4-0.6), potentially representing “resting” and  
391 activated neutrophils, respectively, increased in the OE post-damage (Fig. 7H). The  
392 columnar shaped cells (ci 0.1-0.3) increased in frequency at one dpt in the sensory  
393 region (Fig. 7H, green, 0.2 -0.3 green bars) but remained as the least common  
394 morphology. We found that damage to the OE resulted in an increased number of  
395 rounded neutrophils and a small but significant number were double labeled for BrdU,  
396 thus the majority of the increase in neutrophil number was likely due to migration as  
397 opposed to proliferation. Future work using photoconvertible lineage tracers will allow us  
398 to determine the exact contribution of local vs. immigrant neutrophils in the response to  
399 damage in developing and adult brain.

400

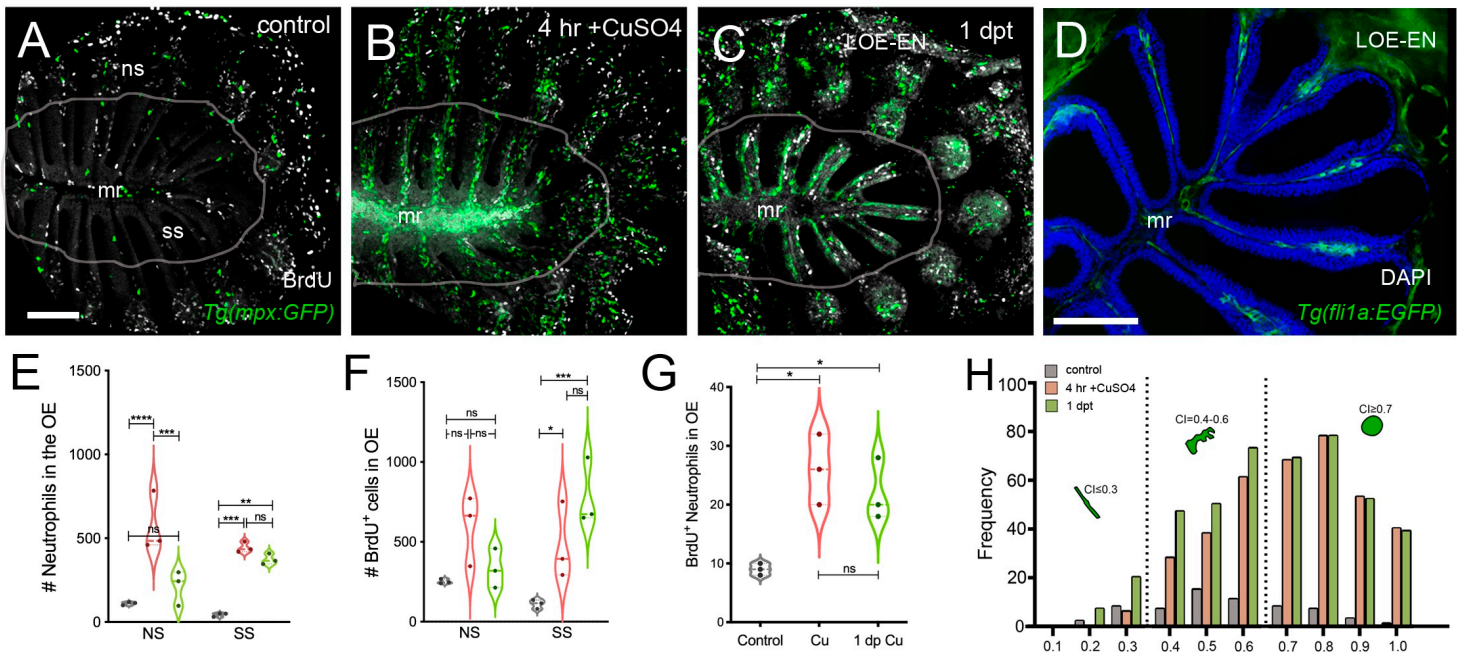

400

401 **Figure 7. Damage induces changes in cell division of OSN and neutrophil**  
 402 **precursors in the adult olfactory organ. A-C.** BrdU labeled cells (white), neutrophils  
 403 (green) in whole mount OO of adult fish. Scale bars A-C = 50  $\mu$ m **A.** Prior to copper  
 404 exposure BrdU labeling and scattered neutrophils were observed in the medial raphe  
 405 (mr), sensory (ss), and non-sensory (ns) epithelia. n= 3 OE. **B.** After four hours of  
 406 exposure to copper intense BrdU labeling was observed in the mr. n= 3 OE. **C.** One day  
 407 post recovery neutrophils lined the lamellae and intense BrdU labeling was observed in  
 408 ss and LOE-EN. n= 3 OE. **D.** Section of *Tg(fli1a:EGFP)* adult OE showing extensions of  
 409 blood vasculature (green) within the OE. Scale bar = 100  $\mu$ m. n= 3 sectioned heads. **E.**  
 410 Significant increases in neutrophil number were observed after 4 hour copper exposure  
 411 (red) in both the ns and ss epithelia when compared to control (grey). At one dpt (green)  
 412 only the ss remained significantly greater than controls. n= 3 OE. **F.** Damage induced



413 changes in BrdU<sup>+</sup> cells have were significant in the ss epithelia but not the ns at 4 hour  
414 copper exposure (red) and one dpt (green). n= 3 OE. **G**. There was a small but  
415 significant increase in mpX:GFP<sup>+</sup> cells double labeled for BrdU scored in the OE. (E-G,  
416 n=3 adult OE from different fish; Two-way ANOVA, Tukey multiple comparison test, p <  
417 0.05). (\*P, 0.05, \*\*P, 0.01, \*\*\*P, 0.001). n= 3 OE. **H**. Four hours of copper exposure  
418 (orange) and one day post-treatment (green) resulted in an increase in rounded  
419 neutrophils (nt1; circularity index 0.7 or greater see Fig. 1) and amoeboid neutrophils  
420 (nt2; circularity index 0.4-0.6) when compared to controls.  
421

421 **DISCUSSION:**

422 In this study we have shown that the olfactory sensory system has a unique “immune  
423 architecture” where neutrophils permanently populate the olfactory sensory organs in  
424 association with a complex network of BV-LV. These neutrophils mount a rapid  
425 response to copper-induced damage to the OE populating not only the tissues of the  
426 OE and associated EN, but also appearing in tracts extending posteriorly along the  
427 ventral CNS. These data demonstrate a role for resident neutrophils in the olfactory  
428 sensory system and suggest that the nasal lymphatic pathway may be a potential site of  
429 entry for immune cells into the CNS.

430 *Lymphatic Vasculature*

431 The olfactory/nasal lymphatic route was first described using India ink to label CSF  
432 drainage pathways from the brain where particles moved from cranial subarachnoid  
433 space to lymphatic channels of the olfactory mucosa (Jackson *et al.*, 1979).  
434 Subsequently it was shown that while the subarachnoid space of the optic nerves and  
435 cochlea region were labeled, the only direct connection between cranial CSF and  
436 lymphatics was the nasal route (Kida *et al.*, 1993; Kida *et al.*, 1995; Koh *et al.*, 2005)  
437 passing through cribriform plate along perineural spaces near the olfactory nerves to the  
438 nasal mucosa and cervical lymph nodes (Sun *et al.*, 2018). With the re-discovery of the  
439 brain lymphatics (Louveau *et al.*, 2015) the relative importance of the drainage of CSF  
440 via the meningeal LV versus olfactory/nasal LV is currently a subject of debate (see for  
441 discussion (Dolgin, 2020).

442 In descriptions of the olfactory/nasal drainage in mammals, the LV is generally depicted  
443 with terminations at the extra-cranial side of the cribriform plate. Here we found two  
444 types of lyve1b:EGFP<sup>+</sup> LV: one having muLEC like structure where the cells line the BV

445 (Bower and Hogan, 2018; Bower *et al.*, 2017), appeared to be connected, and were  
446 found on both the intracranial and extra cranial side of the cribriform plate; and a second  
447 with morphology similar to HEVs that were found in association with the OE/EN on the  
448 extra-cranial side of the cribriform plate.

449 The muLEC-like LV wrap the dorsal and ventral surfaces of the olfactory bulbs  
450 extending posteriorly along the ventral telencephalon and anteriorly through the  
451 cribriform plate with the BV. Within the muLEC-like cells there were two populations:  
452 one positive only for lyve1b and a second positive for both lyve1b and fli1a. During  
453 development muLECS have been shown to form from local blood vessels by (Bower *et*  
454 *al.*, 2017) and these forming cells are positive for both fli1a and lyve1b. Thus, the  
455 lyve1b+/fli1a+ population may represent adult progenitors of LV important in  
456 restructuring the OE after extensive damage. The muLEC-like cells appear to be  
457 connected, yet future studies are needed to confirm that these cells are from the non-  
458 lumenized mural lineage (Okuda and Hogan, 2020).

459 *Lymph node equivalent in fish:* In mammals the nasal lymphatic route that drains into  
460 the cervical lymph nodes through the cribriform plate, carry immune cells such as  
461 monocytes, dendritic cells, and T cells (Goldmann *et al.*, 2006; Hsu *et al.*, 2019). In  
462 addition, mammals have Nasal-Associated Lymphoid Tissue (NALT) also referred to as  
463 Waldeyer's lymphatic ring, surrounding the naso/oropharynx. This tissue contains  
464 lymphatic vessels and HEVs, which are specialized post-capillary venous swellings,  
465 enable lymphocytes circulating in the blood to directly enter a lymph node (by crossing  
466 through the HEV). Recently tissue described as NALT has been reported in fish (Das  
467 and Salinas, 2020; Sepahi and Salinas, 2016), yet fish do not have lymph nodes. Thus

468 a distinction is made between “organized” NALT and “diffuse NALT” (Sepahi and  
469 Salinas, 2016) or NALT versus non-NALT (for murine nasal dendritic cells (Lee *et al.*,  
470 2015) where teleost fish have diffuse-NALT/non-NALT in the olfactory organs. Here we  
471 found that the OE/EN has an extensive blood vasculature associated with  
472 lyve1b:EGFP<sup>+</sup> lymphatic endothelial cells resembling high endothelial venules (HEVs) of  
473 the lymph nodes in mammals (Fig. 8, olfactory epithelia, upper, HEV-like). The HEV-like  
474 cells were localized to the tips of the LOE extending on the external side of the EN to  
475 the base, terminating in the region where the meningeal membranes fuse on the extra-  
476 cranial side of the cribriform plate. At the tips of the LOE, on the internal side, the BV is  
477 associated with the HEV-like cells and in this region we identified lyve1b/fli1a<sup>+</sup> cells  
478 similar to those seen in the OB although not on the BV. This cell type was also  
479 observed lining the cribriform plate in the region of the meninges (Fig. 5). The structures  
480 observed raise the possibility that in spite of lacking lymph nodes, the zebrafish OOs  
481 shows similarities with mammalian lymph node organization thus suggesting the  
482 existence of an organized secondary lymphoid tissue in the OO.  
483

484  
486  
488  
490  
492  
494  
496  
498  
500  
502  
504  
506  
508  
510  
511  
512  
513  
514  
515  
516  
517  
518  
519  
520

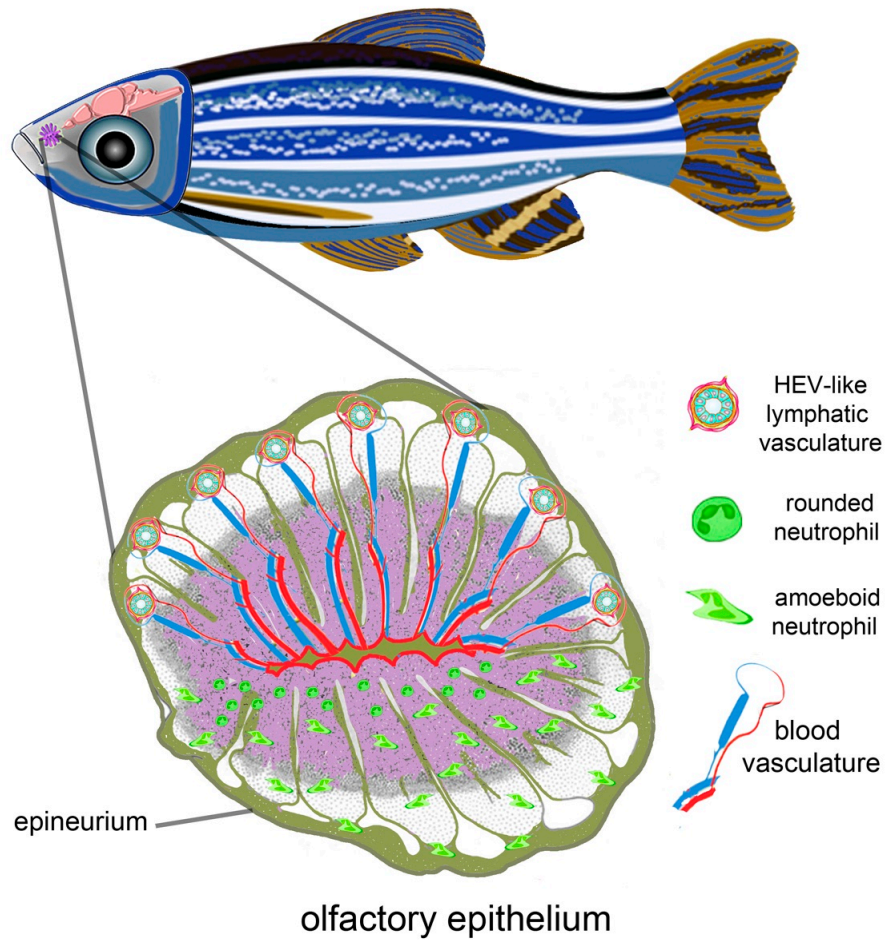

**Figure 8. Olfactory organ is neural-immune interface.** Schematic of olfactory epithelium of adult zebrafish. The Blood-Vasculature-LV and neutrophils are shown in different halves of the olfactory rosette for clarity. Upper half of olfactory epithelium are proposed connections of Blood-Vasculature (BV) with LV via HEV-like cells that may also contact the meningeal immune system via vasculature associated with the epineurium. Lower half of olfactory rosette depicts resident neutrophils found only in the OE.

521 *Neutrophils*

522 It has recently been shown that neutrophils, in addition to their role as the first line of  
523 defense in the innate immune response, also transport antigens and populate lymph  
524 nodes via HEVs where they coordinate early adaptive immune responses (Hampton *et*  
525 *al.*, 2015; Hampton and Chtanova, 2016; Li *et al.*, 2019). Neutrophils are found in many  
526 tissues and these subpopulations of neutrophils perform many functions (Rosales,  
527 2018) such as in the lung, which is known to retain neutrophils as a host defense niche  
528 (Kubes, 2018; Yipp *et al.*, 2017). In mammals the OE is reported to have B  
529 lymphocytes, lactoferrin and lysozyme, in the Bowman's glands (Mellert *et al.*, 1992)  
530 and neutrophils in the non-sensory epithelium of the vomeronasal organ (Getchell and  
531 Kulkarni, 1995). In teleosts, limited morphological studies have shown scattered myeloid  
532 and lymphoid cells within the OE and lamina propria (Dong *et al.*, 2020; Tacchi *et al.*,  
533 2014) (Yu *et al.*, 2018). Most recently, in the OO, in response to inflammation  
534 neutrophils infiltrate and later express neurogenesis-related genes suggesting a  
535 potential role for neutrophils in the ongoing neurogenesis of the OE (Ogawa *et al.*,  
536 2021).

537 The neutrophils we observed in the OOs were striking not only in their number but also  
538 their limited distribution: they were found only in the OOs of the adult brain under normal  
539 conditions. After copper exposure there was a large increase in the number of  
540 neutrophils in the OE/EN and subsequently neutrophils appeared in the CNS initially in  
541 the ON, ventral lateral OB and then extending posteriorly along the ventral  
542 telencephalon, although far fewer neutrophils were observed in the CNS. This ventral  
543 tract from OOs contains a rich network of LV (Fig. 1), and has previously been

544 suggested as a route for immune cell influx through the basal forebrain in mice  
545 (Pägelow *et al.*, 2018) and mesenchymal stem cell migration cell from the periphery to  
546 the OB (Galeano *et al.*, 2018). Thus the pattern of neutrophils observed is suggestive  
547 of neutrophil movement from the periphery along the ON, ventral OB and ventral  
548 telencephalon. While it is tempting to propose that these neutrophils enter from the OE  
549 into the CNS, more experiments are needed to better understand the source of the CNS  
550 neutrophils.

551

552 Conclusions: In mammals the olfactory/nasal brain lymphatic drainage system is  
553 assumed to function not only in water homeostasis and pressure regulation, but also in  
554 immune responses and surveillance within the meningeal lymphatic system (Sun *et al.*,  
555 2018). Yet here we have shown that the OOs have an extensive blood lymphatic  
556 vasculature (including HEV-like structures) enveloping the OE, a large resident  
557 neutrophil population and furthermore, that damage induced in the olfactory sensory  
558 epithelia is correlated with the appearance of neutrophils in the brain. Whether the  
559 presence of these neutrophils is related to the regenerative properties of the OE as the  
560 OSNs undergo constant replacement, represents a special population secondary  
561 lymphoid tissue capable of mounting a rapid immune response, or both, remains to be  
562 determined.

563

## 564 **Material and Methods**

### 565 **Animals**

566 Zebrafish were maintained in a re-circulating system (Aquatic Habitats Inc, Apopka, FL)  
567 at 28°C on a light-dark cycle of 14 and 10 hours respectively. All fish were maintained  
568 in the Whitlock Fish Facility at the Universidad de Valparaiso. Wild-type (WT) fish of the  
569 Cornell strain (derived from Oregon AB) were used. All protocols and procedures  
570 employed were reviewed and approved by the Institutional Committee of Bioethics for  
571 Research with Experimental Animals, University of Valparaiso (#BA084-2016). Adults  
572 used in the study were 12-16 months of age. The following transgenic lines were used  
573 to visualize specific cell types: *Tg(BACmpx:gfpl)<sup>y114</sup>*, *Tg(mpx:GFP)* (Renshaw *et al.*,  
574 2006); *(Tg(fli1a:EGFP)<sup>y1</sup>* *Tg(fli1a:EGFP)*; (Lawson and Weinstein, 2002);  
575 *Tg(-5.2lyve1b:DsRed)<sup>nz101</sup>*, *Tg(2lyve1b:DsRed)* *Tg(-5.2lyve1b:EGFP)<sup>nz151</sup>*  
576 *Tg(lyve1b:EGFP)* ), (Okuda *et al.*, 2012); *Tg(gata1a:DsRed)<sup>sd2</sup>* *Tg(gata1a:DsRed)*  
577 (Traver *et al.*, 2003), *Tg(pOMP<sup>2k</sup>:gap-YFP)<sup>nw032a</sup>*, *Tg(OMP:YFP)*; *Tg(pOMP<sup>2k</sup>:lyn-*  
578 *mRFP)<sup>nw035a</sup>* *Tg(OMP:RFP)* (Sato *et al.*, 2005); *Tg(six4b:mCh)*, (Harden *et al.*, 2012).

### 579 **Copper Exposure**

580 Initial dose response analysis was performed based on previous work in zebrafish and  
581 salmon (Baldwin *et al.*, 2003); (Hernandez *et al.*, 2011). A stock solution of 10 mM  
582 CuSO<sub>4</sub> was diluted in system water for a final concentration of 10 uM CuSO<sub>4</sub>.

### 583 **Immunocytochemistry and Cell Labeling**

584 Dissected adult brains were fixed in 4% PFA in 0.1M phosphate buffer 0.4M pH 7.3), or  
585 1X phosphate-buffered saline PBS pH 7.4. Brains were rinsed three times in phosphate  
586 buffer or PBS, permeabilized in acetone at -20 °C for 10 minutes and then incubated for  
587 two hours in blocking solution (10 mg/ml BSA, 1% DMSO, 0.5% Triton X-100 (Sigma)  
588 and 4% normal goat serum in 0.1M phosphate buffer or 1X PBS). Primary antibodies



589 used were anti-RFP (rabbit 1:250, Life Technologies), anti-GFP (mouse 1:500, Life  
590 Technologies), anti-GFP (rabbit 1:500, Invitrogen), anti-DsRed (mouse 1:500, Santa  
591 Cruz Biotechnology), anti-HuC/D (rabbit 1:500, Invitrogen) and anti-BrdU (rabbit  
592 1:250, Invitrogen). Adult brains were incubated with the primary antibody for up to a  
593 week. After washes, tissues were incubated overnight in experiment dependent  
594 secondary antibodies: Dylight 488 conjugated anti-mouse antibody (goat 1:500,  
595 Jackson Immuno Research), Alexa Fluor 488 conjugated anti-rabbit antibody (goat  
596 1:1000, Molecular Probes), Alexa Fluor 568 conjugated anti-rabbit antibody (goat  
597 1:1000, Molecular Probes), Alexa Fluor 568 conjugated anti-mouse antibody (goat  
598 1:1000, Molecular Probes), Dylight 650 conjugated anti-rabbit antibody (goat 1:500,  
599 Jackson Immuno Research), Alexa Fluor 350 conjugated anti-rabbit antibody (goat  
600 1:1000, Molecular Probes). Tissues were then rinsed in 0.1M phosphate buffer or 1X  
601 PBS with 1% DMSO, stained for DAPI (1  $\mu$ g/ml, Sigma), washed in 0.1M phosphate  
602 buffer or 1X PBS and mounted in 1.5 % low melting temperature agarose (Sigma) in an  
603 Attofluor Chamber for subsequent imaging (see below).

#### 604 **BrdU Labeling**

605 For each experiment nine adult fish were first housed overnight in 1.5 liter tanks  
606 containing 10 mM BrdU in system water. The next morning three fish were transferred  
607 to a new 1.5-liter tank with system water (control) and six fish were transferred to a new  
608 1.5 liter tank with system water containing 10  $\mu$ M CuSO<sub>4</sub>, and allowed to swim freely (4  
609 hours). All control fish (3) and half of copper-exposed fish (3) were then anesthetized,  
610 sacrificed and heads fixed overnight in 4% PFA/1X PBS. The other half of copper-  
611 exposed fish (3) were transferred to a clean 1.5-liter tank, filled with system water, and

612 allowed to recover. The next day, these fish were anesthetized, sacrificed and fixed as  
613 described above. After fixation, heads were incubated in EDTA (0.2 M, pH 7.5) for three  
614 days at 4 °C and brains dissected in sterile 1X PBS and pre treated in 2 M HCl for 30  
615 minutes at 37 °C. Immunocytochemistry was performed as described in  
616 Immunocytochemistry & Cell Labeling. For imaging, whole adult brains were mounted  
617 on 2% low melting temperature Agarose, and OE were mounted between coverslips, as  
618 described above. The removal of brains from the skull with the OO still attached is a  
619 difficult dissection because the OSN axons pass through the cribriform plate to arrive in  
620 the OB. Therefore it was not always possible to have a preparation with both OE still  
621 connected to the brain.

## 622 **Cryosectioning**

623 Fish were euthanized and heads were fixed overnight in 4% PFA at 4 °C and decalcified  
624 in EDTA (0.2 M, pH 7.6) for 3 days, and later embedded in 1.5% agarose/ 5% sucrose  
625 blocks and submerged in 30% sucrose for 3 days at 4 °C. Blocks were frozen (-20 °C)  
626 with O.C.T. Compound (Tissue Tek®) and sectioned (25 µm) using a cryostat.

627 For flat mounting of the olfactory epithelia, olfactory rosettes were dissected after  
628 immunohistochemistry or staining, and mounted with the caudal side down on Poly-L-  
629 Lysine coated slides between triple 22x22 coverslip bridges and covered in  
630 VECTASHIELD® Antifade Mounting Media (Vector laboratories).

## 631 **Imaging and Image analysis**

632 *Microscopy:* Fluorescent images were taken using a Spinning Disc microscope  
633 Olympus BX-DSU (Olympus Corporation, Shinjuku-ku, Tokyo, Japan) and acquired with  
634 ORCA IR2 Hamamatsu camera (Hamamatsu Photonics, Higashi-ku, Hamamatsu City,

635 Japan). Images were acquired using the Olympus CellR software (Olympus Soft  
636 Imaging Solutions, Munich, Germany). Some images were also obtained using a  
637 confocal laser scanning microscope (Nikon C1 Plus; Nikon, Tokyo, Japan). Images  
638 were then deconvoluted in AutoQuantX 2.2.2 (Media Cybernetics, Bethesda, MD, USA)  
639 and processed using FIJI (National Institute of Health, Bethesda, Maryland, USA;  
640 (Schindelin *et al.*, 2012) and CellProfiler (McQuin *et al.*, 2018).

### 641 **Image Analyses**

642 *Neutrophils*: Only neutrophils within the boundaries of the olfactory organs in adults  
643 were counted and the values were given as the average of total number of mp $\alpha$ :GFP  
644 positive with standard deviation. Values given for paired sensory structure are a sum of  
645 the individual sensory tissues.

646 To analyze the distribution of mp $\alpha$ :GFP<sup>+</sup> neutrophils from both whole adult brains and  
647 flat-mounted olfactory rosettes, images were filtered by size (6-30  $\mu$ m) and pixel  
648 intensity, and then counted using CellProfiler available Pipelines (McQuin *et al.*, 2018).  
649 For quantification of neutrophils in different regions of the OE, sensory (ss) versus non-  
650 sensory (ns) regions were separated using *Tg(OMP:RFP)* animals or anti-HuC/D  
651 labeling as neuronal markers. We grouped the ns region with the epineurial extensions  
652 (EN) wrapping the OE. The percent of total neutrophils is the number of GFP cells in ss  
653 or ns regions, divided by total (sum of all GFP positive cells in ss, ns and EN). BrdU  
654 nuclei were detected by filtering size between 2-5  $\mu$ m and co-localization between BrdU  
655 and neutrophils was done using “Co-localization” Pipeline in CellProfiler (McQuin *et al.*,  
656 2018).

657 The circularity index of each neutrophil was calculated using Analyze Particles in FIJI  
658 (National Institute of Health, Bethesda, Maryland, USA; (Schindelin *et al.*, 2012).  
659 Neutrophils were size-filtered and values were graphed according frequency of  
660 distribution.

661 *BV/LV vessel density*. Density is defined by the ratio of the area positive for fli1a:EGFP  
662 (BV) and lyve1b:DsRed (LV) over the total dorsal telencephalic or the olfactory system  
663 area (which includes both the OE and OB). Protocol adapted from Zhao *et al.*, 2016  
664 (Zhao *et al.*, 2016).

665 **Statistics.** Data are presented as means  $\pm$  standard deviations. Experiments number  
666 and statistical analysis were done using Prism 9 (Graphpad), and are indicated in each  
667 figure legend. Unpaired Student's t-tests were performed unless otherwise indicated. P  
668 values are indicated as follows: \*P, 0.05, \*\*P, 0.01, \*\*\*P, 0.001.

669

670

670 **Acknowledgements:**

671 **Acknowledgments:** We would like to acknowledge Andrea Moscoso and Maria  
672 Trinidad Ordenes for excellent management of the zebrafish facility.

673 **Funding:** Grants/Fellowships Fondo Nacional de Desarrollo Científico y Tecnológico  
674 (FONDECYT) 1160076 (KEW); ICM-ANID Instituto Milenio Centro Interdisciplinario de  
675 Neurociencias de Valparaíso PO9-022-F, supported by the Millennium Scientific  
676 Initiative of the Ministerio de Ciencia (K.E.W, M.F.P.); CONICYT Doctoral Fellowship  
677 (ANID) 21161437 (MFP). The funding bodies did not take part in the design of the  
678 study, the collection, analysis, and interpretation of data, or in the writing of the  
679 manuscript.

680 **Availability of data and materials:** The datasets used and/or analyzed during the  
681 current study are provided as a supplemental Source Data file.

682 **Competing Interests:** The authors have no competing interests.

683

684

685

686

687

688

688 **REFERENCES:**

- 689 Ager, A., 2017. High Endothelial Venules and Other Blood Vessels: Critical Regulators  
690 of Lymphoid Organ Development and Function. *Front Immunol.* 8:45.,  
691 10.3389/fimmu.2017.00045. eCollection 02017.
- 692 Aspelund, A., Antila, S., Proulx, S.T., Karlsen, T.V., Karaman, S., Detmar, M., Wiig, H.,  
693 Alitalo, K., 2015. A dural lymphatic vascular system that drains brain interstitial  
694 fluid and macromolecules. *J Exp Med.* 212, 991-999. doi:  
695 10.1084/jem.20142290. Epub 20142015 Jun 20142215.
- 696 Baldwin, D.H., Sandahl, J.F., Labenia, J.S., Scholz, N.L., 2003. Sublethal effects of  
697 copper on coho salmon: impacts on nonoverlapping receptor pathways in the  
698 peripheral olfactory nervous system. *Environ Toxicol Chem.* 22, 2266-2274. doi:  
699 10.1002/etc.1000.
- 700 Bayramli, X., Kocagöz, Y., Sakizli, U., Fuss, S.H., 2017. Patterned Arrangements of  
701 Olfactory Receptor Gene Expression in Zebrafish are Established by Radial  
702 Movement of Specified Olfactory Sensory Neurons. *Sci Rep.* 7, 5572. doi:  
703 10.1038/s41598-017-06041-41591.
- 704 Beauvillain, C., Cunin, P., Doni, A., Scotet, M., Jaillon, S., Loiry, M.L., Magistrelli, G.,  
705 Masternak, K., Chevaller, A., Delneste, Y., Jeannin, P., 2011. CCR7 is involved  
706 in the migration of neutrophils to lymph nodes. *Blood.* 117, 1196-1204. doi:  
707 10.1182/blood-2009-1111-254490. Epub 252010 Nov 254494.
- 708 Bjørgen, H., Koppang, E.O., 2021. Anatomy of teleost fish immune structures and  
709 organs. *Immunogenetics.* 73, 53-63. doi: 10.1007/s00251-00020-01196-00250.  
710 Epub 02021 Jan 00211.

- 711 Boehm, T., Hess, I., Swann, J.B., 2012. Evolution of lymphoid tissues. *Trends Immunol.*  
712 33, 315-321. doi: 310.1016/j.it.2012.1002.1005. Epub 2012 Apr 1016.
- 713 Bower, N.I., Hogan, B.M., 2018. Brain drains: new insights into brain clearance  
714 pathways from lymphatic biology. *J Mol Med (Berl)*. 96, 383-390. doi:  
715 310.1007/s00109-00018-01634-00109. Epub 02018 Apr 00102.
- 716 Bower, N.I., Koltowska, K., Pichol-Thievend, C., Virshup, I., Paterson, S., Lagendijk,  
717 A.K., Wang, W., Lindsey, B.W., Bent, S.J., Baek, S., Rondon-Galeano, M.,  
718 Hurley, D.G., Mochizuki, N., Simons, C., Francois, M., Wells, C.A., Kaslin, J.,  
719 Hogan, B.M., 2017. Mural lymphatic endothelial cells regulate meningeal  
720 angiogenesis in the zebrafish. *Nat Neurosci*. 20, 774-783. doi: 710.1038/nn.4558.  
721 Epub 2017 May 1031.
- 722 Brann, J.H., Firestein, S.J., 2014. A lifetime of neurogenesis in the olfactory system.  
723 *Front Neurosci*. 8:182., 10.3389/fnins.2014.00182. eCollection 02014.
- 724 Calfún, C. (2017) "Genomic Plasticity in the Olfactory Epithelium mediated by Odorant  
725 Exposure in Zebrafish (*Danio rerio*)". Doctorate Thesis. Universidad de  
726 Valparaiso.
- 727 Calfun, C., Dominguez, C., Perez-Acle, T., Whitlock, K.E., 2016. Changes in Olfactory  
728 Receptor Expression Are Correlated With Odor Exposure During Early  
729 Development in the zebrafish (*Danio rerio*). *Chem Senses*. 41, 301-312. doi:  
730 310.1093/chemse/bjw1002. Epub 2016 Feb 1017.
- 731 Cserr, H.F., Harling-Berg, C.J., Knopf, P.M., 1992. Drainage of brain extracellular fluid  
732 into blood and deep cervical lymph and its immunological significance. *Brain*  
733 *Pathol*. 2, 269-276. doi: 210.1111/j.1750-3639.1992.tb00703.x.

- 734 Da Mesquita, S., Fu, Z., Kipnis, J., 2018. The Meningeal Lymphatic System: A New  
735 Player in Neurophysiology. *Neuron*. 100, 375-388. doi:  
736 310.1016/j.neuron.2018.1009.1022.
- 737 Das, P.K., Salinas, I., 2020. Fish nasal immunity: From mucosal vaccines to  
738 neuroimmunology. *Fish Shellfish Immunol*. 104:165-171.,  
739 10.1016/j.fsi.2020.1005.1076. Epub 2020 Jun 1011.
- 740 Dolgin, E., 2020. Brain's drain. *Nat Biotechnol*. 38, 258-262. doi: 210.1038/s41587-  
741 41020-40443-41581.
- 742 Dong, F., Yin, G.M., Meng, K.F., Xu, H.Y., Liu, X., Wang, Q.C., Xu, Z., 2020. IgT Plays  
743 a Predominant Role in the Antibacterial Immunity of Rainbow Trout Olfactory  
744 Organs. *Front Immunol*. 11:583740., 10.3389/fimmu.2020.583740. eCollection  
745 582020.
- 746 Faber, W.M., 1937. The nasal mucosa and the subarachnoid space. *American Journal*  
747 *of Anatomy* Vol. 6, 121-148.
- 748 Galeano, C., Qiu, Z., Mishra, A., Farnsworth, S.L., Hemmi, J.J., Moreira, A., Edenhoffer,  
749 P., Hornsby, P.J., 2018. The Route by Which Intranasally Delivered Stem Cells  
750 Enter the Central Nervous System. *Cell Transplant*. 27, 501-514. doi:  
751 510.1177/0963689718754561. Epub 0963689718752018 May  
752 0963689718754514.
- 753 Getchell, M.L., Kulkarni, A.P., 1995. Identification of neutrophils in the nonsensory  
754 epithelium of the vomeronasal organ in virus-antibody-free rats. *Cell Tissue Res*.  
755 280, 139-151. doi: 110.1007/BF00304519.



- 756 Goldmann, J., Kwidzinski, E., Brandt, C., Mahlo, J., Richter, D., Bechmann, I., 2006. T  
757 cells traffic from brain to cervical lymph nodes via the cribroid plate and the nasal  
758 mucosa. *J Leukoc Biol.* 80, 797-801. doi: 710.1189/jlb.0306176. Epub 0302006  
759 Aug 0306172.
- 760 Hampton, H.R., Bailey, J., Tomura, M., Brink, R., Chtanova, T., 2015. Microbe-  
761 dependent lymphatic migration of neutrophils modulates lymphocyte proliferation  
762 in lymph nodes. *Nat Commun.* 6:7139., 10.1038/ncomms8139.
- 763 Hampton, H.R., Chtanova, T., 2016. The lymph node neutrophil. *Semin Immunol.* 28,  
764 129-136. doi: 110.1016/j.smim.2016.1003.1008. Epub 2016 Mar 1026.
- 765 Harden, M.V., Newton, L.A., Lloyd, R.C., Whitlock, K.E., 2006. Olfactory imprinting is  
766 correlated with changes in gene expression in the olfactory epithelia of the  
767 zebrafish. *Journal of Neurobiology* 66, 1452-1466.
- 768 Harden, M.V., Pereiro, L., Ramialison, M., Wittbrodt, J., Prasad, M.K., McCallion, A.S.,  
769 Whitlock, K.E., 2012. Close association of olfactory placode precursors and  
770 cranial neural crest cells does not predestine cell mixing. *Developmental*  
771 *Dynamics* 241, 1143-1154.
- 772 Harrison-Brown, M., Liu, G.J., Banati, R., 2016. Checkpoints to the Brain: Directing  
773 Myeloid Cell Migration to the Central Nervous System. *Int J Mol Sci.* 17, 2030.  
774 doi: 2010.3390/ijms17122030.
- 775 Hedrick, M.S., Hillman, S.S., Drewes, R.C., Withers, P.C., 2013. Lymphatic regulation in  
776 nonmammalian vertebrates. *1985*). 115, 297-308. doi:  
777 210.1152/jappphysiol.00201.02013. Epub 02013 May 00202.

- 778 Hernandez, P.P., Undurraga, C., Gallardo, V.E., Mackenzie, N., Allende, M.L., Reyes,  
779 A.E., 2011. Sublethal concentrations of waterborne copper induce cellular stress  
780 and cell death in zebrafish embryos and larvae. *Biol Res.* 44, 7-15. doi:  
781 10.4067/S0716-97602011000100002. Epub 97602011000102011 May  
782 97602011000100011.
- 783 Hsu, M., Rayasam, A., Kijak, J.A., Choi, Y.H., Harding, J.S., Marcus, S.A., Karpus,  
784 W.J., Sandor, M., Fabry, Z., 2019. Neuroinflammation-induced  
785 lymphangiogenesis near the cribriform plate contributes to drainage of CNS-  
786 derived antigens and immune cells. *Nat Commun.* 10, 229. doi:  
787 210.1038/s41467-41018-08163-41460.
- 788 Iqbal, T., Byrd-Jacobs, C., 2010. Rapid degeneration and regeneration of the zebrafish  
789 olfactory epithelium after triton X-100 application. *Chem Senses.* 35, 351-361.  
790 doi: 310.1093/chemse/bjq1019. Epub 2010 Mar 1012.
- 791 Jackson, R.T., Tigges, J., Arnold, W., 1979. Subarachnoid space of the CNS, nasal  
792 mucosa, and lymphatic system. *Arch Otolaryngol.* 105, 180-184. doi:  
793 110.1001/archotol.1979.00790160014003.
- 794 Kaminski, M., Bechmann, I., Pohland, M., Kiwit, J., Nitsch, R., Glumm, J., 2012.  
795 Migration of monocytes after intracerebral injection at entorhinal cortex lesion  
796 site. *J Leukoc Biol.* 92, 31-39. doi: 10.1189/jlb.0511241. Epub 0512012 Jan  
797 0511230.
- 798 Khorrooshi, R., Marczyńska, J., Dieu, R.S., Wais, V., Hansen, C.R., Kavan, S.,  
799 Thomassen, M., Burton, M., Kruse, T., Webster, G.A., Owens, T., 2020. Innate

- 800 signaling within the central nervous system recruits protective neutrophils. *Acta*  
801 *Neuropathol Commun.* 8, 2. doi: 10.1186/s40478-40019-40876-40472.
- 802 Kida, S., Pantazis, A., Weller, R.O., 1993. CSF drains directly from the subarachnoid  
803 space into nasal lymphatics in the rat. Anatomy, histology and immunological  
804 significance. *Neuropathol Appl Neurobiol.* 19, 480-488. doi: 410.1111/j.1365-  
805 2990.1993.tb00476.x.
- 806 Kida, S., Weller, R.O., Zhang, E.T., Phillips, M.J., Iannotti, F., 1995. Anatomical  
807 pathways for lymphatic drainage of the brain and their pathological significance.  
808 *Neuropathol Appl Neurobiol.* 21, 181-184. doi: 110.1111/j.1365-  
809 2990.1995.tb01048.x.
- 810 Koh, L., Zakharov, A., Johnston, M., 2005. Integration of the subarachnoid space and  
811 lymphatics: is it time to embrace a new concept of cerebrospinal fluid absorption?  
812 *Cerebrospinal Fluid Res.* 2:6., 10.1186/1743-8454-1182-1186.
- 813 Kubes, P., 2018. The enigmatic neutrophil: what we do not know. *Cell Tissue Res.* 371,  
814 399-406. doi: 310.1007/s00441-00018-02790-00445. Epub 02018 Feb 00445.
- 815 Lawson, N.D., Weinstein, B.M., 2002. In vivo imaging of embryonic vascular  
816 development using transgenic zebrafish. *Dev Biol.* 248, 307-318. doi:  
817 310.1006/dbio.2002.0711.
- 818 Lee, H., Ruane, D., Law, K., Ho, Y., Garg, A., Rahman, A., Esterházy, D., Cheong, C.,  
819 Goljo, E., Sikora, A.G., Mucida, D., Chen, B.K., Govindraj, S., Breton, G.,  
820 Mehandru, S., 2015. Phenotype and function of nasal dendritic cells. *Mucosal*  
821 *Immunol.* 8, 1083-1098. doi: 1010.1038/mi.2014.1135. Epub 2015 Feb 1011.

- 822 Li, Y., Wang, W., Yang, F., Xu, Y., Feng, C., Zhao, Y., 2019. The regulatory roles of  
823 neutrophils in adaptive immunity. *Cell Commun Signal*. 17, 147. doi:  
824 110.1186/s12964-12019-10471-y.
- 825 Louveau, A., Smirnov, I., Keyes, T.J., Eccles, J.D., Rouhani, S.J., Peske, J.D., Derecki,  
826 N.C., Castle, D., Mandell, J.W., Lee, K.S., Harris, T.H., Kipnis, J., 2015.  
827 Structural and functional features of central nervous system lymphatic vessels.  
828 *Nature*. 523, 337-341. doi: 10.1038/nature14432. Epub 12015 Jun 14431.
- 829 Maletto, B.A., Ropolo, A.S., Alignani, D.O., Liscovsky, M.V., Ranocchia, R.P., Moron,  
830 V.G., Pistoiresi-Palencia, M.C., 2006. Presence of neutrophil-bearing antigen in  
831 lymphoid organs of immune mice. *Blood*. 108, 3094-3102. doi: 10.1182/blood-  
832 2006-3004-016659. Epub 012006 Jul 016611.
- 833 Manda-Handzlik, A., Demkow, U., 2019. The Brain Entangled: The Contribution of  
834 Neutrophil Extracellular Traps to the Diseases of the Central Nervous System.  
835 *Cells*. 8, 1477. doi: 10.3390/cells8121477.
- 836 McQuin, C., Goodman, A., Chernyshev, V., Kametsky, L., Cimini, B.A., Karhohs, K.W.,  
837 Doan, M., Ding, L., Rafelski, S.M., Thirstrup, D., Wiegraebe, W., Singh, S.,  
838 Becker, T., Caicedo, J.C., Carpenter, A.E., 2018. CellProfiler 3.0: Next-  
839 generation image processing for biology. *PLoS Biol*. 16, e2005970. doi:  
840 10.1371/journal.pbio.2005970. eCollection 2018 Jul.
- 841 Meinderts, S.M., Baker, G., van Wijk, S., Beuger, B.M., Geissler, J., Jansen, M.H.,  
842 Saris, A., Ten Brinke, A., Kuijpers, T.W., van den Berg, T.K., van Bruggen, R.,  
843 2019. Neutrophils acquire antigen-presenting cell features after phagocytosis of

- 844 IgG-opsonized erythrocytes. *Blood Adv.* 3, 1761-1773. doi:  
845 1710.1182/bloodadvances.2018028753.
- 846 Mellert, T.K., Getchell, M.L., Sparks, L., Getchell, T.V., 1992. Characterization of the  
847 immune barrier in human olfactory mucosa. *Otolaryngol Head Neck Surg.* 106,  
848 181-188.
- 849 Odobasic, D., Kitching, A.R., Holdsworth, S.R., 2016. Neutrophil-Mediated Regulation of  
850 Innate and Adaptive Immunity: The Role of Myeloperoxidase. *J Immunol Res*  
851 2016:2349817., 10.1155/2016/2349817. Epub 2342016 Jan 2349820.
- 852 Ogawa, K., Asano, K., Yotsumoto, S., Yamane, T., Arita, M., Hayashi, Y., Harada, H.,  
853 Makino-Okamura, C., Fukuyama, H., Kondo, K., Yamasoba, T., Tanaka, M.,  
854 2021. Frontline Science: Conversion of neutrophils into atypical Ly6G(+)  
855 SiglecF(+) immune cells with neurosupportive potential in olfactory  
856 neuroepithelium. *J Leukoc Biol.* 109, 481-496. doi: 410.1002/JLB.1001HI0620-  
857 1190RR. Epub 2020 Jul 1029.
- 858 Okuda, K.S., Astin, J.W., Misa, J.P., Flores, M.V., Crosier, K.E., Crosier, P.S., 2012.  
859 lyve1 expression reveals novel lymphatic vessels and new mechanisms for  
860 lymphatic vessel development in zebrafish. *Development.* 139, 2381-2391. doi:  
861 2310.1242/dev.077701. Epub 072012 May 077723.
- 862 Okuda, K.S., Hogan, B.M., 2020. Endothelial Cell Dynamics in Vascular Development:  
863 Insights From Live-Imaging in Zebrafish. *Front Physiol.* 11:842.,  
864 10.3389/fphys.2020.00842. eCollection 02020.
- 865 Pägelow, D., Chhatbar, C., Beineke, A., Liu, X., Nerlich, A., van Vorst, K., Rohde, M.,  
866 Kalinke, U., Förster, R., Halle, S., Valentin-Weigand, P., Hornef, M.W., Fulde, M.,

- 867           2018. The olfactory epithelium as a port of entry in neonatal neurolisteriosis. *Nat*  
868           *Commun.* 9, 4269. doi: 4210.1038/s41467-41018-06668-41462.
- 869 Palominos, M.F., Whitlock, K.E., 2020. The Olfactory Organ Is Populated by Neutrophils  
870           and Macrophages During Early Development. *Front Cell Dev Biol.* 8:604030.,  
871           10.3389/fcell.2020.604030. eCollection 602020.
- 872 Renshaw, S.A., Loynes, C.A., Trushell, D.M., Elworthy, S., Ingham, P.W., Whyte, M.K.,  
873           2006. A transgenic zebrafish model of neutrophilic inflammation. *Blood.* 108,  
874           3976-3978. doi: 3910.1182/blood-2006-3905-024075. Epub 022006 Aug 024022.
- 875 Rosales, C., 2018. Neutrophil: A Cell with Many Roles in Inflammation or Several Cell  
876           Types? *Front Physiol.* 9:113., 10.3389/fphys.2018.00113. eCollection 02018.
- 877 Rua, R., McGavern, D.B., 2018. Advances in Meningeal Immunity. *Trends Mol Med.* 24,  
878           542-559. doi: 510.1016/j.molmed.2018.1004.1003. Epub 2018 May 1013.
- 879 Rustenhoven, J., Drieu, A., Mamuladze, T., de Lima, K.A., Dykstra, T., Wall, M.,  
880           Papadopoulos, Z., Kanamori, M., Salvador, A.F., Baker, W., Lemieux, M., Da  
881           Mesquita, S., Cugurra, A., Fitzpatrick, J., Sviben, S., Kossina, R., Bayguinov, P.,  
882           Townsend, R.R., Zhang, Q., Erdmann-Gilmore, P., Smirnov, I., Lopes, M.B.,  
883           Herz, J., Kipnis, J., 2021. Functional characterization of the dural sinuses as a  
884           neuroimmune interface. *Cell.* 184, 1000-1016.e1027. doi:  
885           1010.1016/j.cell.2020.1012.1040. Epub 2021 Jan 1027.
- 886 Sakano, H., 2010. Neural map formation in the mouse olfactory system. *Neuron.* 67,  
887           530-542. doi: 510.1016/j.neuron.2010.1007.1003.

- 888 Sato, Y., Miyasaka, N., Yoshihara, Y., 2005. Mutually exclusive glomerular innervation  
889 by two distinct types of olfactory sensory neurons revealed in transgenic  
890 zebrafish. *J Neurosci* 25, 4889-4897.
- 891 Schindelin, J., Arganda-Carreras, I., Frise, E., Kaynig, V., Longair, M., Pietzsch, T.,  
892 Preibisch, S., Rueden, C., Saalfeld, S., Schmid, B., Tinevez, J.Y., White, D.J.,  
893 Hartenstein, V., Eliceiri, K., Tomancak, P., Cardona, A., 2012. Fiji: an open-  
894 source platform for biological-image analysis. *Nat Methods*. 9, 676-682. doi:  
895 610.1038/nmeth.2019.
- 896 Sepahi, A., Salinas, I., 2016. The evolution of nasal immune systems in vertebrates. *Mol*  
897 *Immunol.* 69:131-8., 10.1016/j.molimm.2015.1009.1008. Epub 2015 Sep 1019.
- 898 Sun, B.L., Wang, L.H., Yang, T., Sun, J.Y., Mao, L.L., Yang, M.F., Yuan, H., Colvin,  
899 R.A., Yang, X.Y., 2018. Lymphatic drainage system of the brain: A novel target  
900 for intervention of neurological diseases. *Prog Neurobiol.* 163-164:118-143.,  
901 10.1016/j.pneurobio.2017.1008.1007. Epub 2017 Sep 1010.
- 902 Tacchi, L., Musharrafieh, R., Larragoite, E.T., Crossey, K., Erhardt, E.B., Martin, S.A.M.,  
903 LaPatra, S.E., Salinas, I., 2014. Nasal immunity is an ancient arm of the mucosal  
904 immune system of vertebrates. *Nat Commun.* 5:5205., 10.1038/ncomms6205.
- 905 Torres-Paz, J., Whitlock, K.E., 2014. Olfactory sensory system develops from  
906 coordinated movements within the neural plate. *Dev Dyn.* 243, 1619-1631. doi:  
907 1610.1002/dvdy.24194. Epub 22014 Oct 24118.
- 908 Traver, D., Paw, B.H., Poss, K.D., Penberthy, W.T., Lin, S., Zon, L.I., 2003.  
909 Transplantation and in vivo imaging of multilineage engraftment in zebrafish



- 910 bloodless mutants. *Nat Immunol.* 4, 1238-1246. doi: 1210.1038/ni1007. Epub  
911 2003 Nov 1239.
- 912 Voisin, M.B., Nourshargh, S., 2019. Neutrophil trafficking to lymphoid tissues:  
913 physiological and pathological implications. *J Pathol.* 247, 662-671. doi:  
914 610.1002/path.5227. Epub 2019 Feb 1004.
- 915 Whitlock, K.E., 2006. The sense of scents: olfactory behaviors in the zebrafish.  
916 *Zebrafish* 3, 203-213.
- 917 Whitlock, K.E., 2015. The loss of scents: Do defects in olfactory sensory neuron  
918 development underlie human disease? *Birth Defects Res C Embryo Today.* 105,  
919 114-125. doi: 110.1002/bdrc.21094. Epub 22015 Jun 21025.
- 920 Yang, C.W., Strong, B.S., Miller, M.J., Unanue, E.R., 2010. Neutrophils influence the  
921 level of antigen presentation during the immune response to protein antigens in  
922 adjuvants. *J Immunol.* 185, 2927-2934. doi: 2910.4049/jimmunol.1001289. Epub  
923 1002010 Aug 1001282.
- 924 Yipp, B.G., Kim, J.H., Lima, R., Zbytnuik, L.D., Petri, B., Swanlund, N., Ho, M., Szeto,  
925 V.G., Tak, T., Koenderman, L., Pickkers, P., Tool, A.T.J., Kuijpers, T.W., van den  
926 Berg, T.K., Looney, M.R., Krummel, M.F., Kubes, P., 2017. The Lung is a Host  
927 Defense Niche for Immediate Neutrophil-Mediated Vascular Protection. *Sci*  
928 *Immunol.* 2, eaam8929. doi: 8910.1126/sciimmunol.aam8929.
- 929 Yu, Y.Y., Kong, W., Yin, Y.X., Dong, F., Huang, Z.Y., Yin, G.M., Dong, S., Salinas, I.,  
930 Zhang, Y.A., Xu, Z., 2018. Mucosal immunoglobulins protect the olfactory organ  
931 of teleost fish against parasitic infection. *PLoS Pathog.* 14, e1007251. doi:  
932 1007210.1001371/journal.ppat.1007251. eCollection 1002018 Nov.

933 Zhao, Y., Huang, X., Ding, T.W., Gong, Z., 2016. Enhanced angiogenesis, hypoxia and  
934 neutrophil recruitment during Myc-induced liver tumorigenesis in zebrafish. *Sci*  
935 *Rep.* 6:31952., 10.1038/srep31952.

936

937

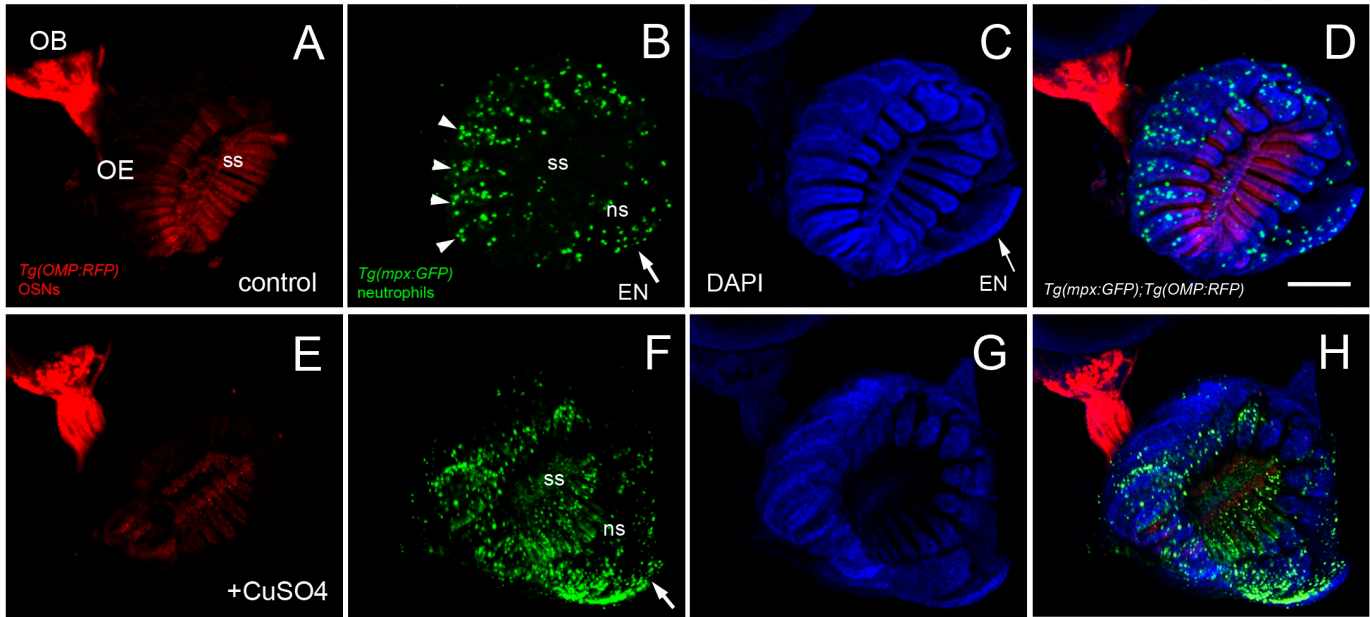

937

938 **SUPPLEMENTAL FIGURES:**

939 Supplemental Figure 1 **Copper exposure induces rapid increase in neutrophils in**

940 **the OOs. A.** OSNs (red) in control animal populate the sensory epithelia of the OE. **B.**

941 Neutrophils in control animal extend up the lamellae and are found in the EN (arrow). **C.**

942 DAPI labeling in control animal. **D.** Merge of A-C. 9 brains imaged: representative image

943 from 1 brain. **E.** Reduced OMP:RFP labeling in OO copper exposed animals as neurons

944 die. **F.** Increase in number of neutrophils in sensory epithelia (ss), non-sensory epithelia

945 (ns) and EN (arrow) of in copper exposed animals. **G.** DAPI in copper exposed animals.

946 **H)** Merge of E-G. 9 brains imaged: representative image from 1 brain. Scale bar = 100

947  $\mu\text{m}$

948
